# Supplementary material
Source: ML conference proceedings conference paper supplement (https://openreview.net/forum?id=-z911HH4RFv)
Supplement: supplementary_material [file attachment]

## Sheet: Sheet1
Algorithm	Logistic Regression	MLP(32)	MLP(64)
ALFR-DS(1)	0.91 ± 0.01	0.96 ± 0.01	0.98 ± 0.01
ALFR-DS(2)	0.9 ± 0.0	0.92 ± 0.02	0.95 ± 0.01
ALFR-DS(3)	0.91 ± 0.0	0.92 ± 0.01	0.93 ± 0.02
ALFR (LR)	0.92 ± 0.03	0.92 ± 0.03	0.95 ± 0.01
ALFR (MLP)	0.93 ± 0.02	0.94 ± 0.01	0.95 ± 0.01
Uncensored	0.96 ± 0.0	0.98 ± 0.0	0.99 ± 0.0
